# Supplementary material for: Experiment level curation of transcriptional regulatory interactions in neurodevelopment
Source: PubMed Central journal article supplement (PMC8565786; doi:10.1371/journal.pcbi.1009484), 2021-10-19
Supplement: pcbi.1009484.s001.pdf [file pcbi.1009484.s001.pdf]

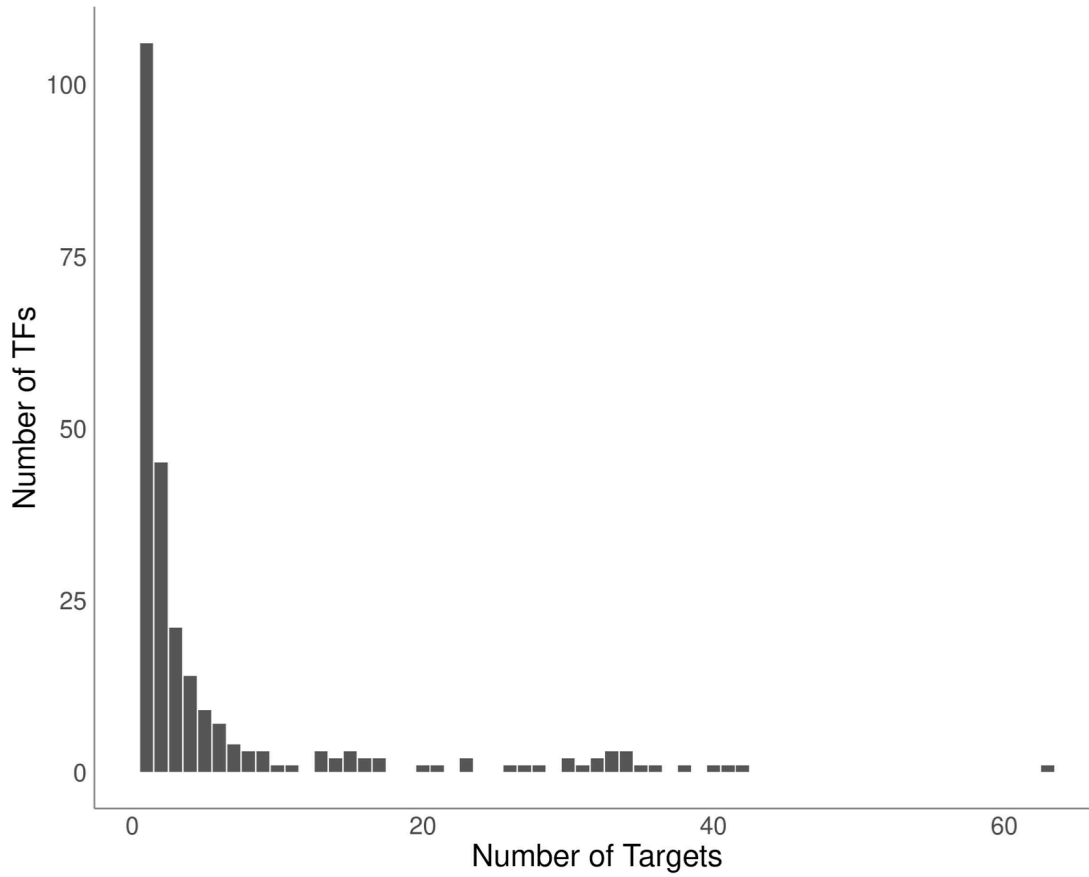

S1 Fig. Distribution of TFs by the number of targets. Only TFs with at least one curated target are plotted. Most (212/251) TFs have less than ten targets recorded.
