# Supplementary material for: Experiment level curation of transcriptional regulatory interactions in neurodevelopment
Source: PubMed Central journal article supplement (PMC8565786; doi:10.1371/journal.pcbi.1009484), 2021-10-19
Supplement: pcbi.1009484.s002.pdf [file pcbi.1009484.s002.pdf]

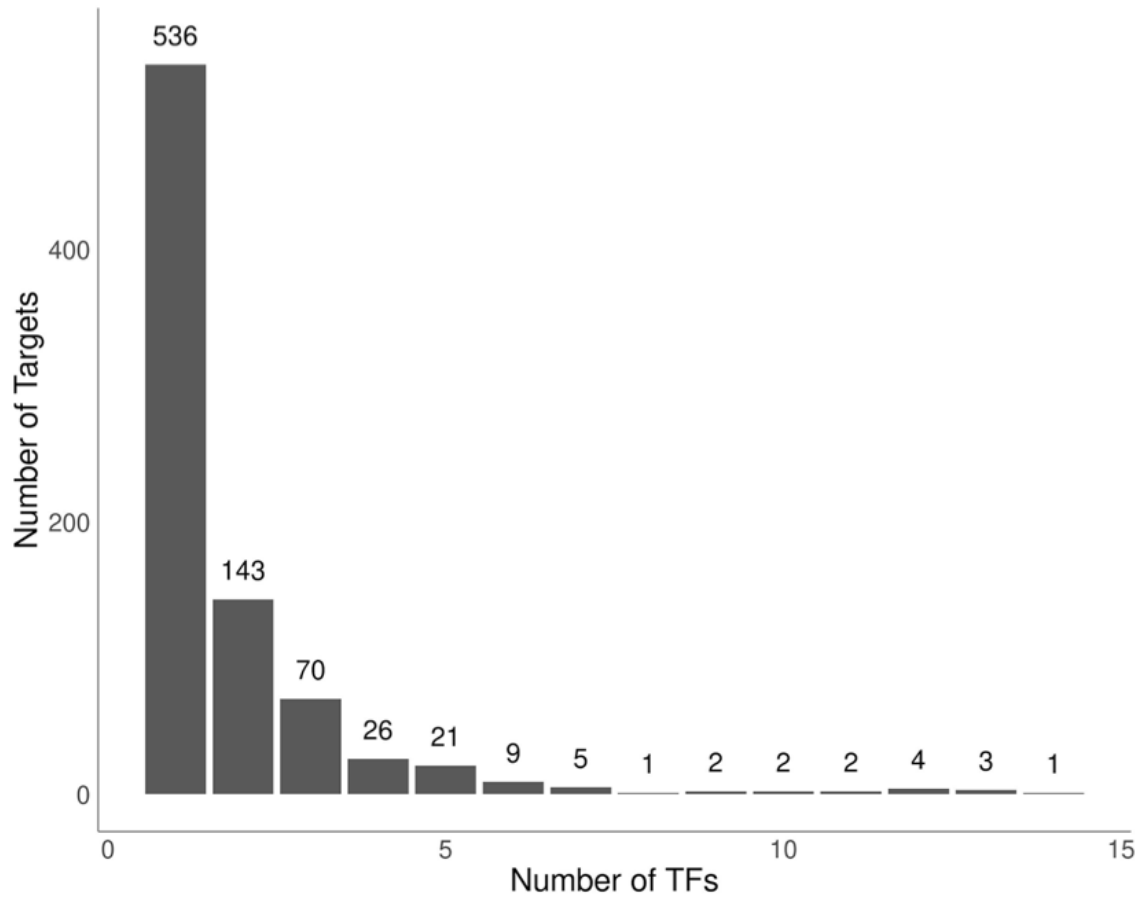

S2 Fig. Distribution of targets by the number of recorded TF regulators. Only targets with at least one recorded TF regulator are included.
