# Supplementary material for: Experiment level curation of transcriptional regulatory interactions in neurodevelopment
Source: PubMed Central journal article supplement (PMC8565786; doi:10.1371/journal.pcbi.1009484), 2021-10-19
Supplement: pcbi.1009484.s010.pdf [file pcbi.1009484.s010.pdf]

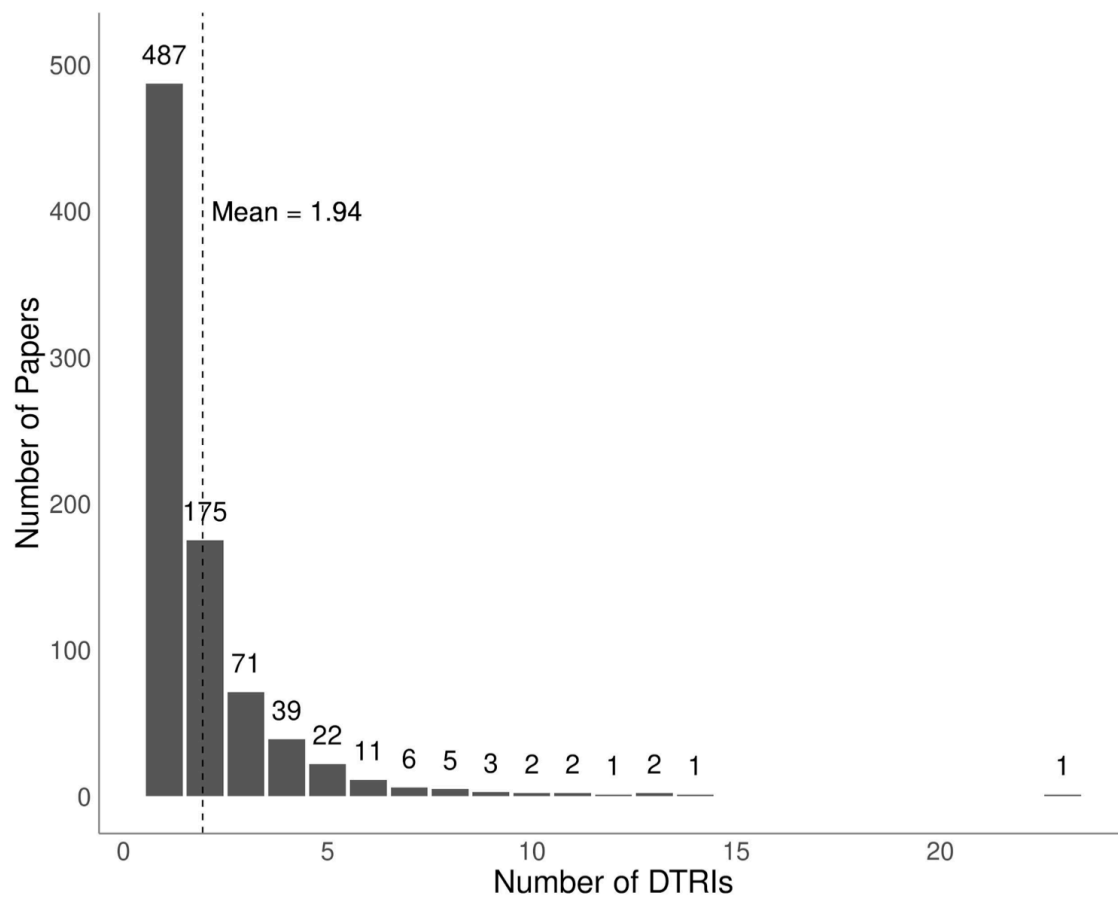

S10 Fig. Distribution of papers by the number of DTRIs reported. Only papers with at least one curated DTRI are included. The majority of papers report only a single DTRI.
