# Supplementary material for: Experiment level curation of transcriptional regulatory interactions in neurodevelopment
Source: PubMed Central journal article supplement (PMC8565786; doi:10.1371/journal.pcbi.1009484), 2021-10-19
Supplement: pcbi.1009484.s012.pdf [file pcbi.1009484.s012.pdf]

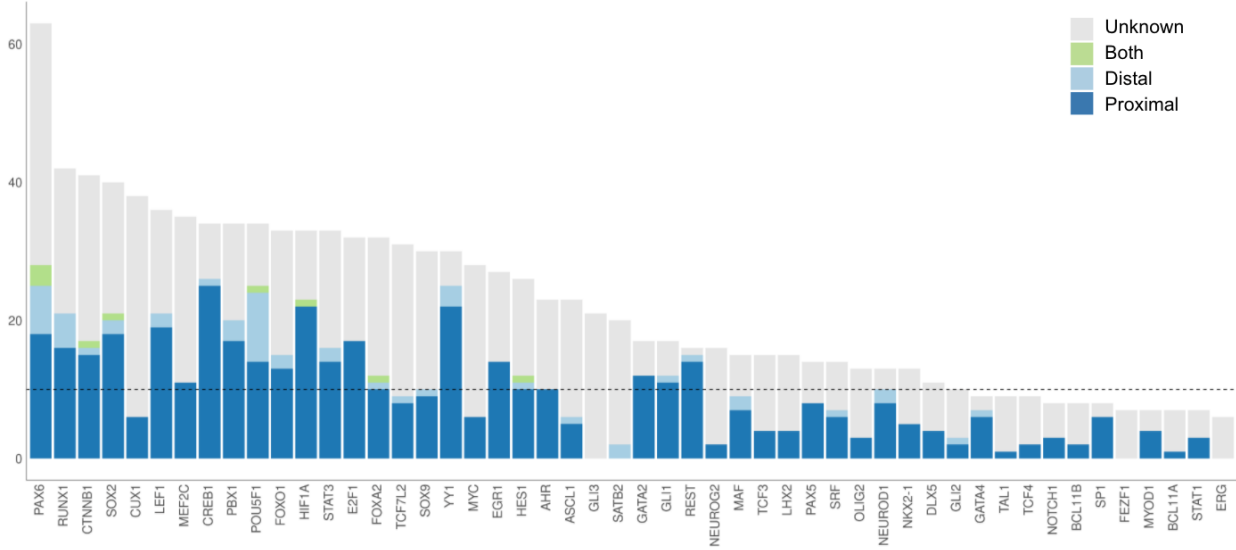

S12 Fig. TFBS Position of DTRIs per TF for the top 50 TFs. Colors correspond to TFBS position annotations. Dotted line indicates 10 targets on the y-axis for reference.
