# Supplementary material for: Experiment level curation of transcriptional regulatory interactions in neurodevelopment
Source: PubMed Central journal article supplement (PMC8565786; doi:10.1371/journal.pcbi.1009484), 2021-10-19
Supplement: pcbi.1009484.s013.pdf [file pcbi.1009484.s013.pdf]

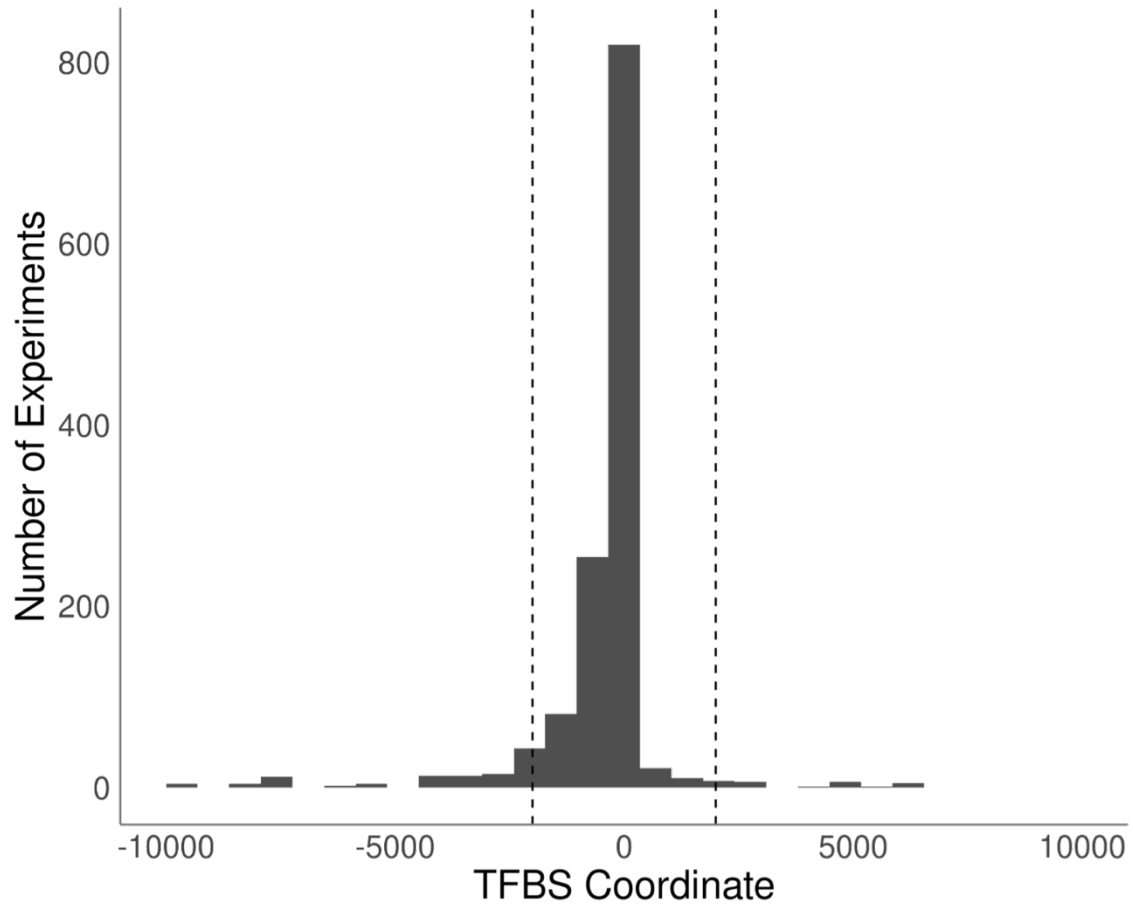

S13 Fig. Distribution of TFBS coordinates across experiments. TFBS coordinates are given relative to the TSS of the target gene. Only the coordinates of the ends closer to the target genes' TSS were recorded. Dotted lines ( $\pm 2000$ ) indicate the threshold for calling proximal or distal TFBSs. Records with coordinates above or below  $\pm 10000$  are not included in this figure.
