# Supplementary material for: Experiment level curation of transcriptional regulatory interactions in neurodevelopment
Source: PubMed Central journal article supplement (PMC8565786; doi:10.1371/journal.pcbi.1009484), 2021-10-19
Supplement: pcbi.1009484.s020.pdf [file pcbi.1009484.s020.pdf]

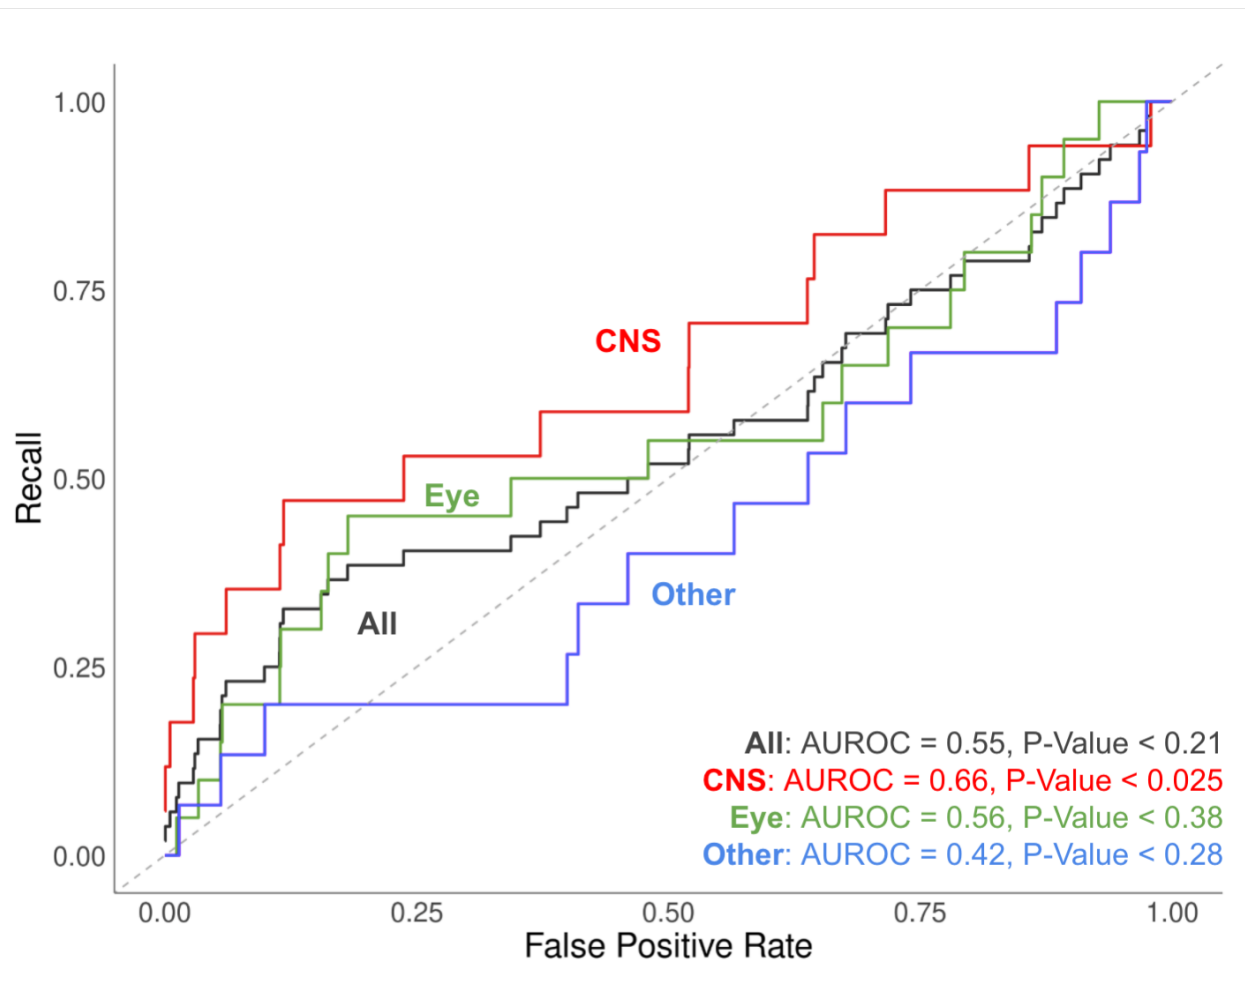

S20 Fig. Enrichment of curated PAX6/Pax6 targets among differentially expressed genes in Narayanan et al., 2018 [1] by tissue types. AUROCs and the corresponding p-values (Mann-Whitney U Test) are displayed in the panel. Color coding corresponds to categories of targets. Only the targets experimentally verified in the CNS show statistically significant enrichment.

## References

1. Narayanan R, Pham L, Kerimoglu C, Watanabe T, Castro Hernandez R, Sokpor G, et al. Chromatin Remodeling BAF155 Subunit Regulates the Genesis of Basal Progenitors in Developing Cortex. *iScience*. 2018;4: 109–126. doi:10.1016/j.isci.2018.05.014
